# Supplementary material for: A modular open platform for systematic functional studies under physiological conditions
Source: PubMed Central journal article supplement — Nucleic Acids Res. 2015 May 24;43(17):e112. doi: 10.1093/nar/gkv550 (PMC4787826; doi:10.1093/nar/gkv550), 2015-05-24
Supplement: supp_gkv550_nar-01079-met-h-2015-File009.pdf [file supp_gkv550_nar-01079-met-h-2015-File009.pdf]

# Supplementary Figure 1

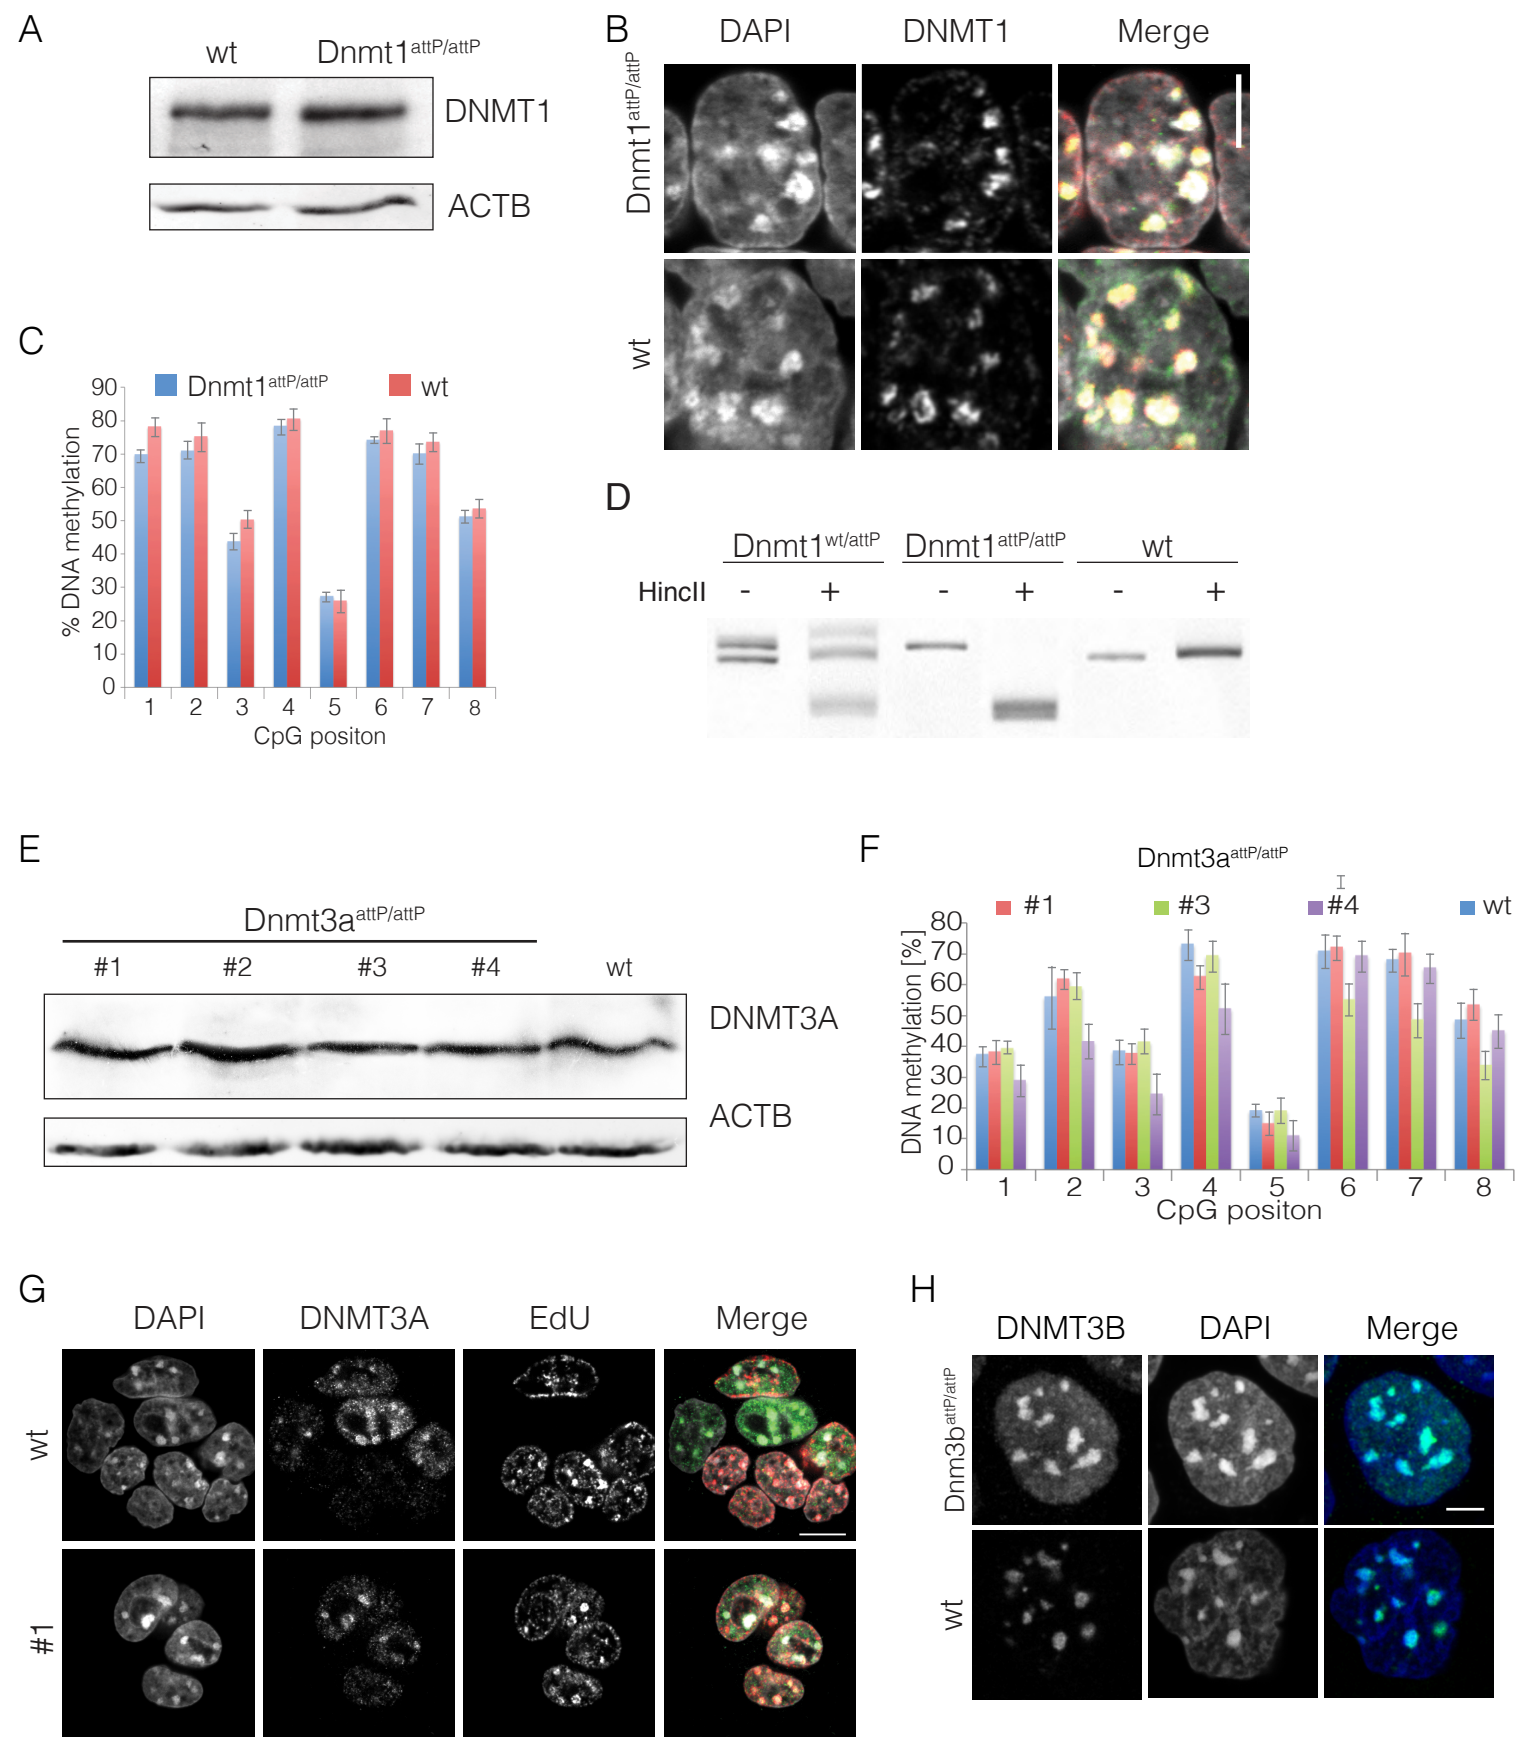

## Supplementary Figure 2

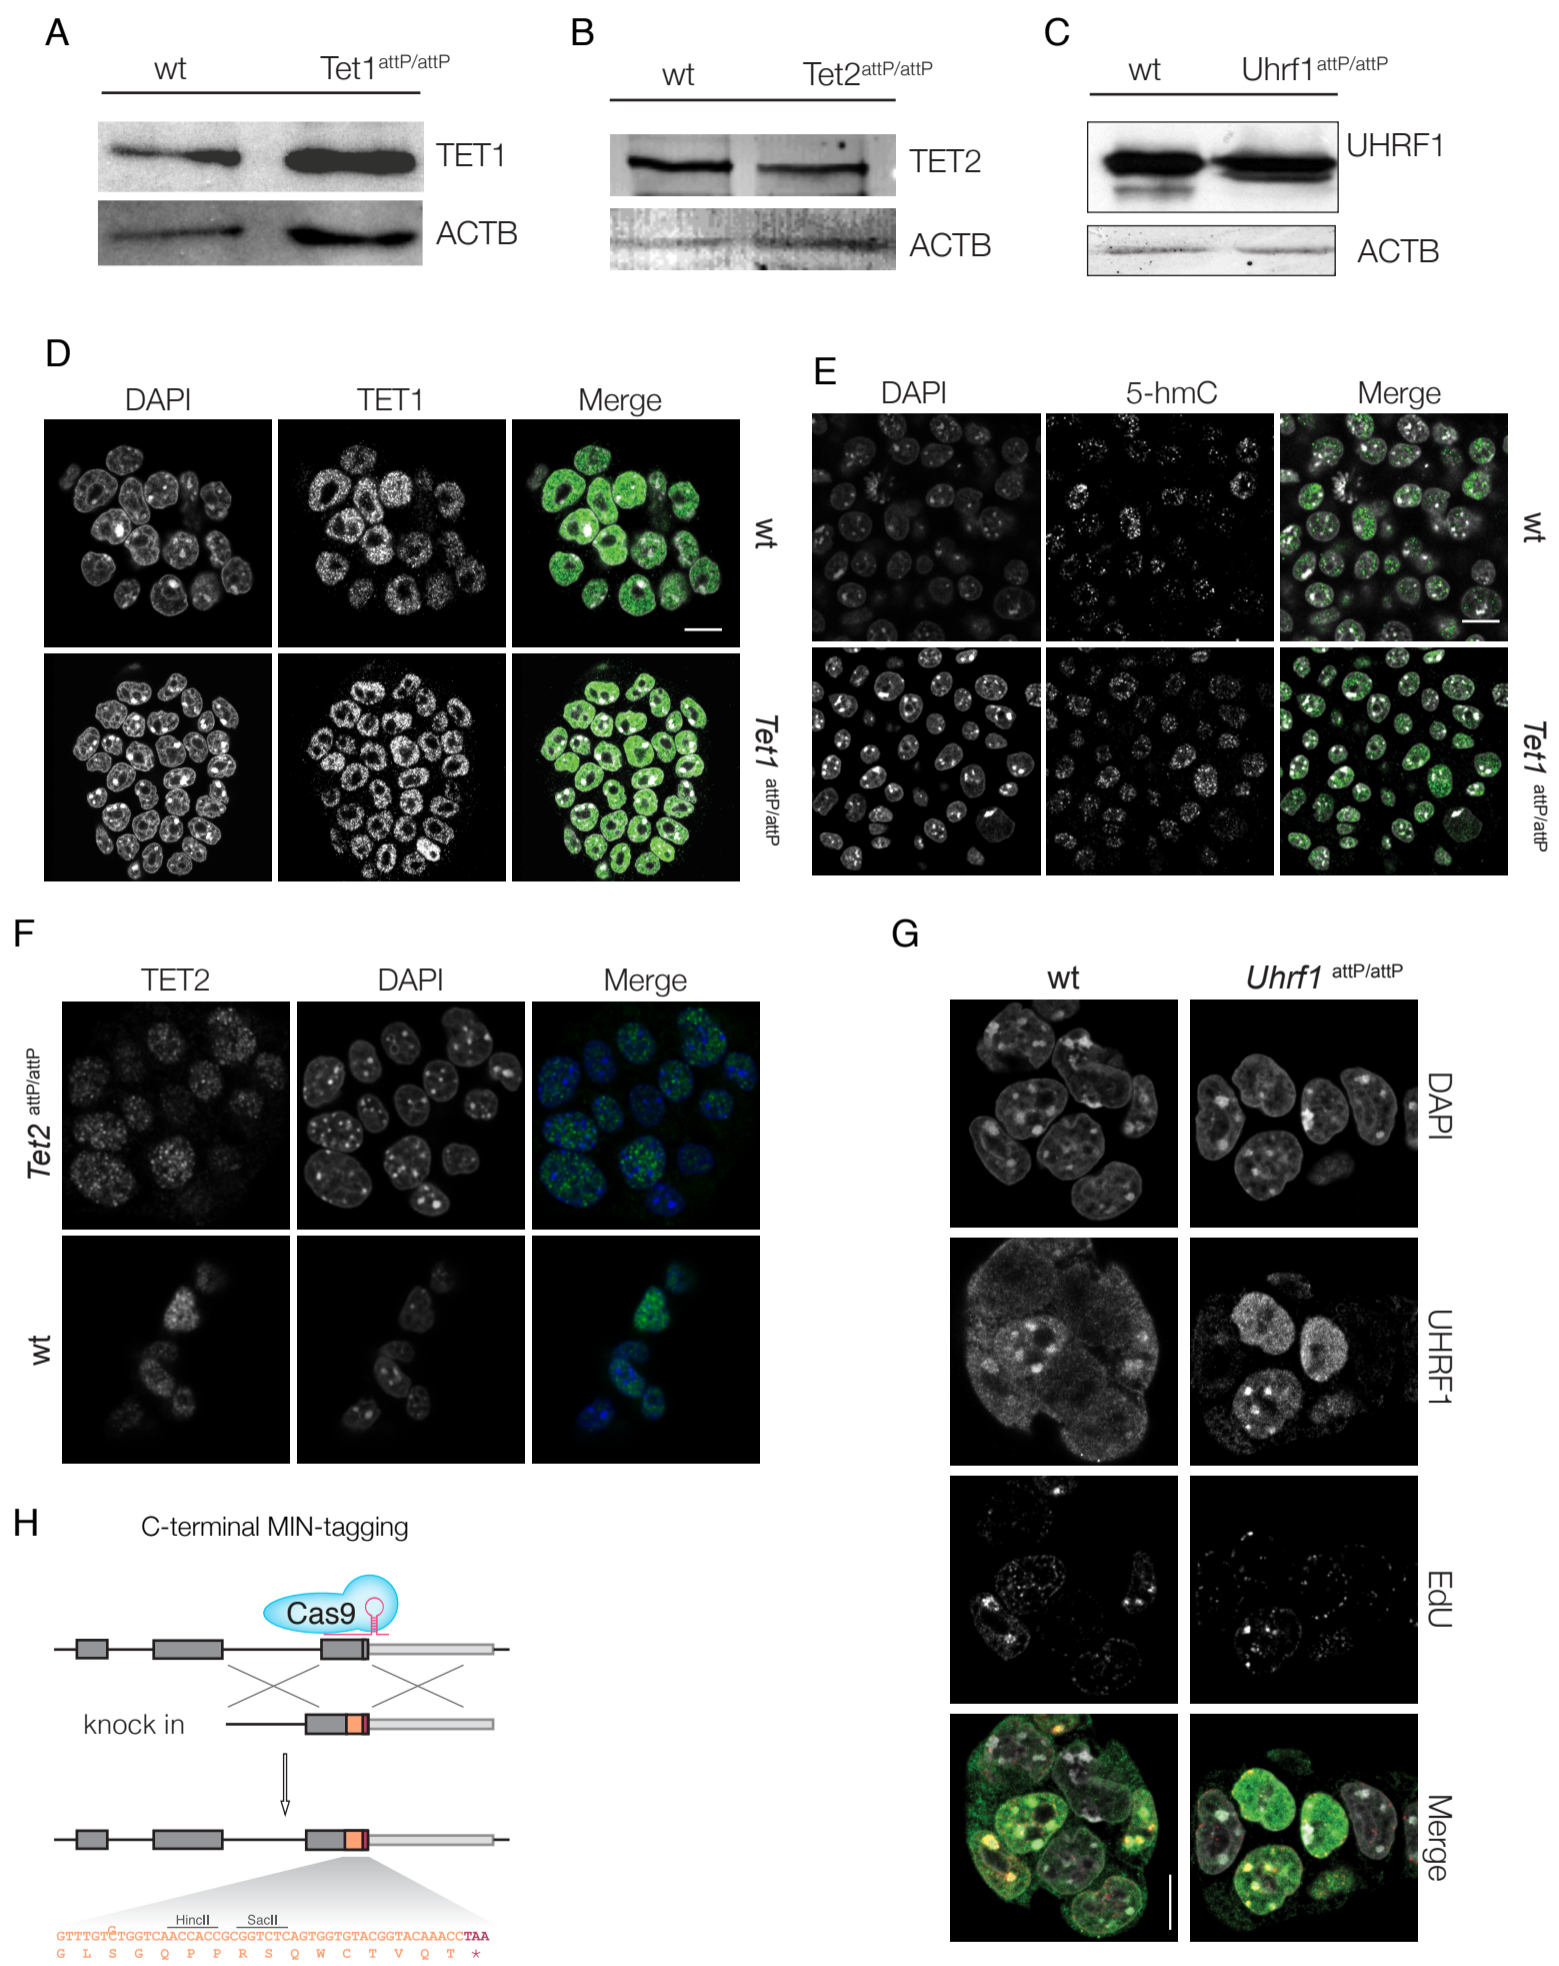

# Supplementary Figure 3

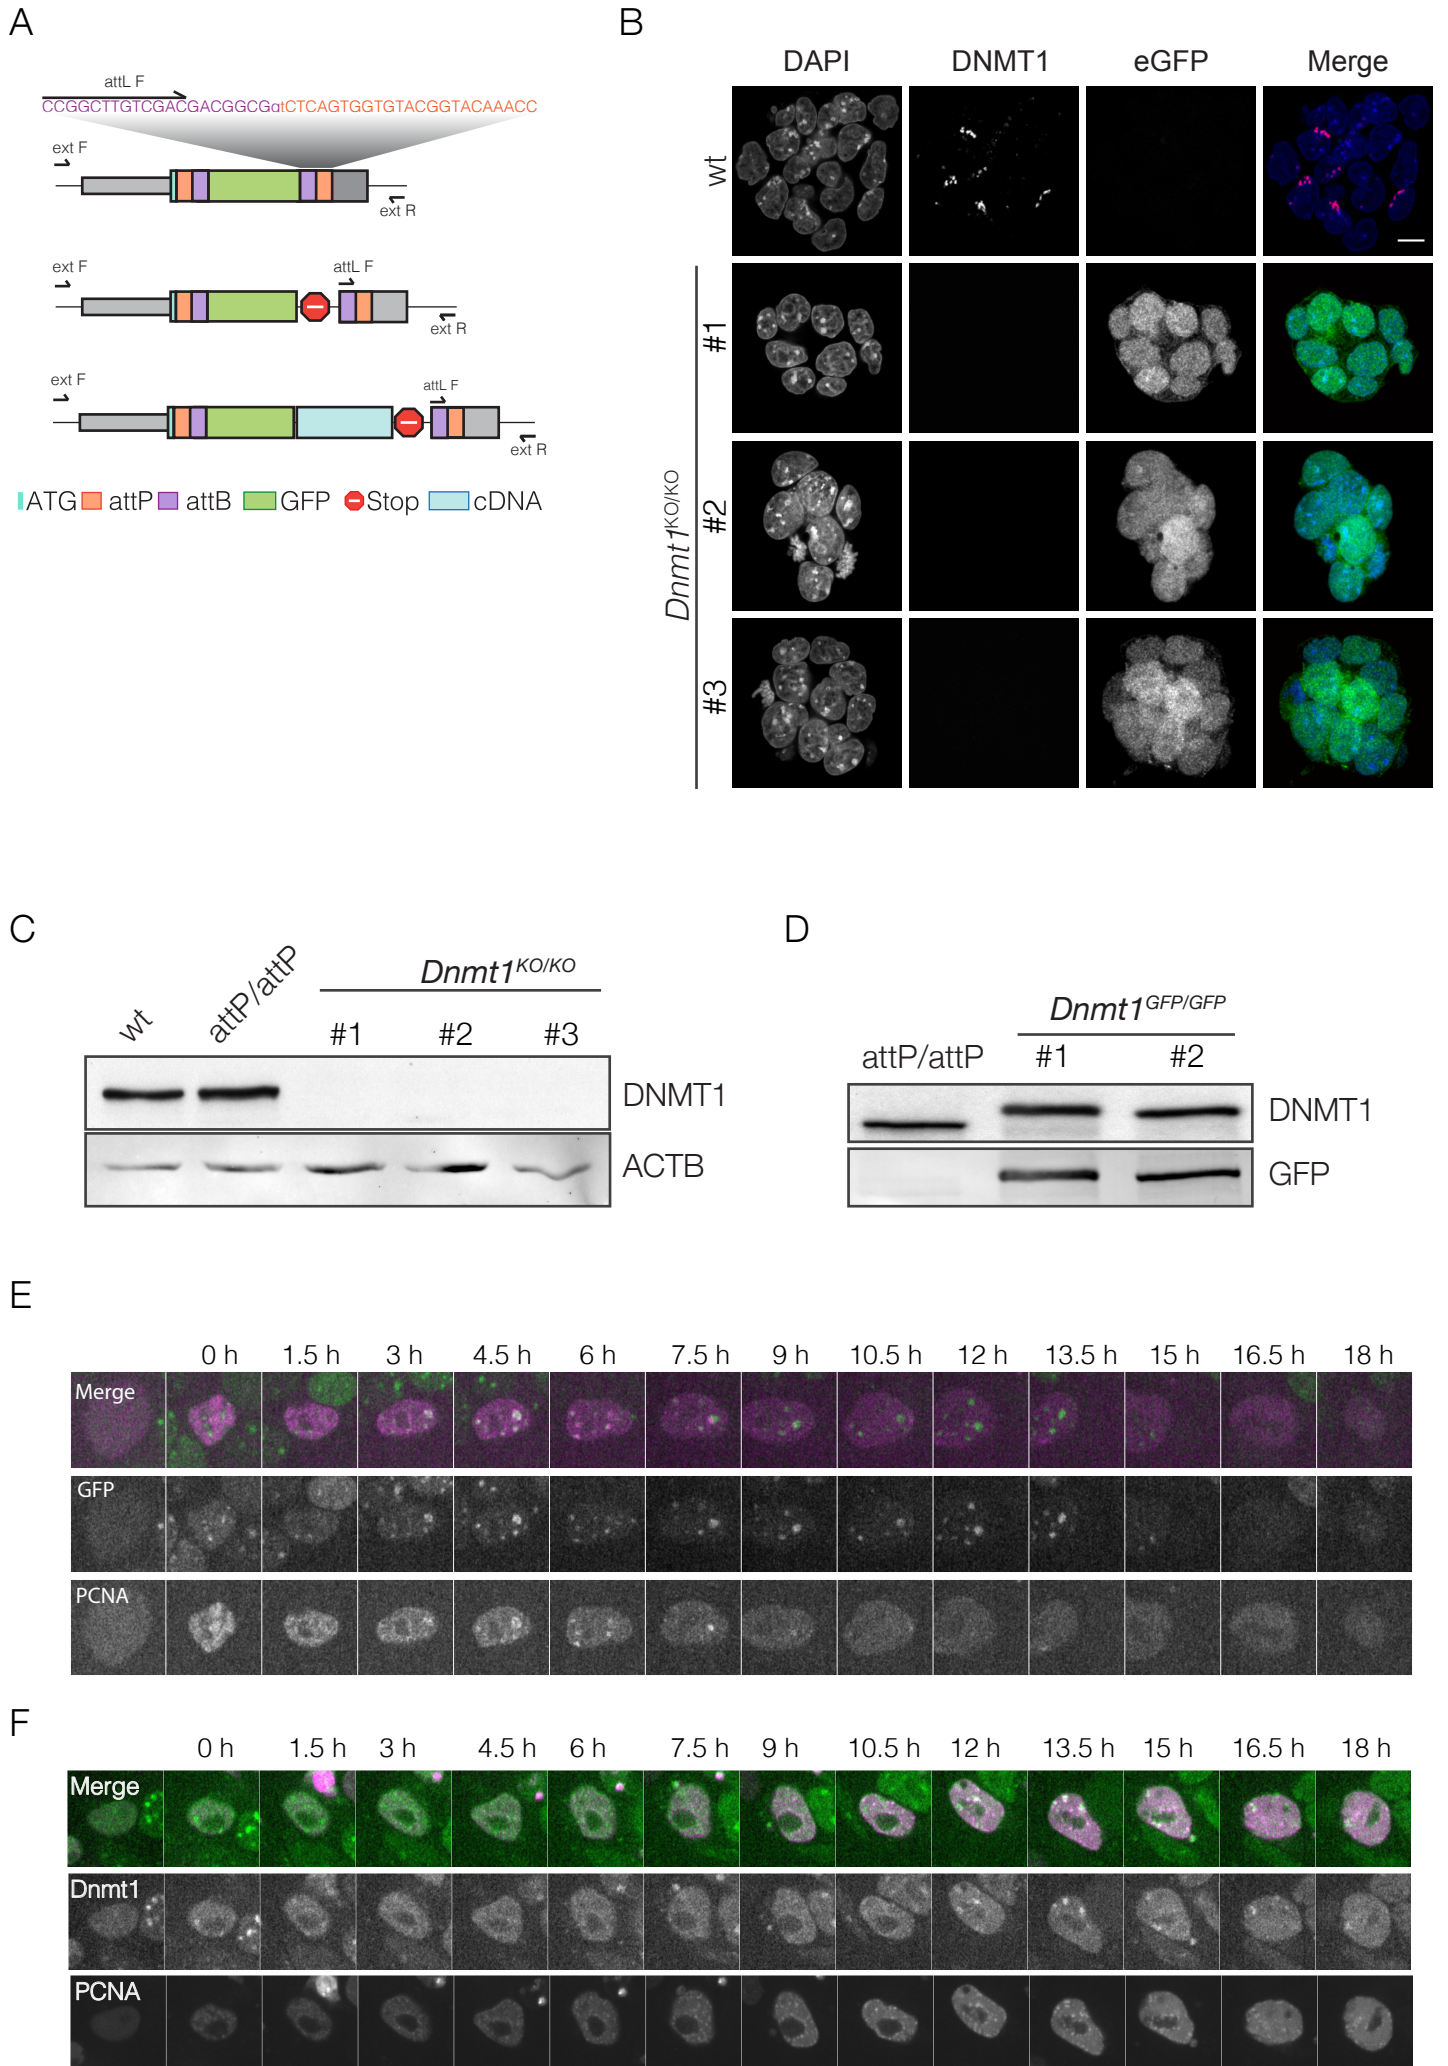

# Supplementary Figure 4

|                           |                          |                           |       |                                                                 |                                                                 |     |
|---------------------------|--------------------------|---------------------------|-------|-----------------------------------------------------------------|-----------------------------------------------------------------|-----|
| A                         | Expected                 | Seq_1                     | 121   | CAGCACATGGACAGCGGAGGAGGAGGCCGAGAACCCTGTACTTTTCAGGGAGGCGGACCGGCT | 180                                                             |     |
|                           | Dnmt1 <sup>GFP/GFP</sup> | Seq_2                     | 101   | CAGCACATGGACAGCGGAGGAGGAGGCCGAGAACCCTGTACTTTTCAGGGAGGCGGACCGGCT | 160                                                             |     |
|                           | Expected                 | Seq_1                     | 181   | TGTCGACGACGGCGGTCTCAGTGGTGTACGGTACAAACCcagcgcgaaacagctccagcc    | 240                                                             |     |
|                           | Dnmt1 <sup>GFP/GFP</sup> | Seq_2                     | 161   | TGTCGACGACGGCGGTCTCAGTGGTGTACGGTACAAACCcagcgcgaaacagctccagcc    | 220                                                             |     |
|                           | <i>attL</i> Sequence     |                           |       |                                                                 |                                                                 |     |
|                           | Expected                 | Seq_1                     | 241   | cgagtgcctgcgcttgccctccccggcaggctcgctccccggaccatgtccgcagggcggtag | 300                                                             |     |
|                           | Dnmt1 <sup>GFP/GFP</sup> | Seq_2                     | 221   | CGAGTGCCTGCGCTTGCCCTCCCCGGCAGGCTCGCTCCCCGGACCATGTCCGCAGGCGGTAG  | 280                                                             |     |
|                           | DNMT1 coding sequence    |                           |       |                                                                 |                                                                 |     |
|                           | B                        | Expected                  | Seq_1 | 121                                                             | CAGCACATGGACAGCGGAGGAGGAGGCCGAGAACCCTGTACTTTTCAGGGAGGCGGACCGGCT | 180 |
|                           |                          | Dnmt3b <sup>GFP/GFP</sup> | Seq_2 | 101                                                             | CAGCACATGGACAGCGGAGGAGGAGGCCGAGAACCCTGTACTTTTCAGGGAGGCGGACCGGCT | 160 |
|                           |                          | Expected                  | Seq_1 | 181                                                             | TGTCGACGACGGCGGTCTCAGTGGTGTACGGTACAAACCaaagggagacagcagacatctg   | 240 |
|                           |                          | Dnmt3b <sup>GFP/GFP</sup> | Seq_2 | 161                                                             | TGTCGACGACGGCGGTCTCAGTGGTGTACGGTACAAACCaaagggagacagcagacatctg   | 220 |
| <i>attL</i> Sequence      |                          |                           |       |                                                                 |                                                                 |     |
| Expected                  |                          | Seq_1                     | 241   | aatgaagaagaggggtgccagcgggtatgaggagtgcattatcgttaatgggaacttcagt   | 300                                                             |     |
| Dnmt3b <sup>GFP/GFP</sup> |                          | Seq_2                     | 221   | AATGAAGAAGAGGGTGCCAGCGGGTATGAGGAGTGCATTATCGTTAATGGGAACTTCAGT    | 280                                                             |     |
| DNMT3B coding sequence    |                          |                           |       |                                                                 |                                                                 |     |
| C                         |                          | Expected                  | Seq_1 | 121                                                             | CAGCACATGGACAGCGGAGGAGGAGGCCGAGAACCCTGTACTTTTCAGGGAGGCGGACCGGCT | 180 |
|                           |                          | Tet1 <sup>GFP/GFP</sup>   | Seq_2 | 101                                                             | CAGCACATGGACAGCGGAGGAGGAGGCCGAGAACCCTGTACTTTTCAGGGAGGCGGACCGGCT | 160 |
|                           |                          | Expected                  | Seq_1 | 181                                                             | TGTCGACGACGGCGGTCTCAGTGGTGTACGGTACAAACCcgggtcccgcggcgaaagcct    | 240 |
|                           |                          | Tet1 <sup>GFP/GFP</sup>   | Seq_2 | 161                                                             | TGTCGACGACGGCGGTCTCAGTGGTGTACGGTACAAACCcgggtcccgcggcgaaagcct    | 220 |
|                           | <i>attL</i> Sequence     |                           |       |                                                                 |                                                                 |     |
|                           | Expected                 | Seq_1                     | 241   | tccaaatcagtcaaaacaaagctacagaaaaaagaaagacatccagatgaagacgaagaca   | 300                                                             |     |
|                           | Tet1 <sup>GFP/GFP</sup>  | Seq_2                     | 221   | TCCAAATCAGTCAAAACAAAGCTACAGAAAAAGAAAGACATCCAGATGAAGACGAAGACA    | 280                                                             |     |
|                           | TET1 coding sequence     |                           |       |                                                                 |                                                                 |     |
|                           | D                        | Expected                  | Seq_1 | 121                                                             | CAGCACATGGACAGCGGAGGAGGAGGCCGAGAACCCTGTACTTTTCAGGGAGGCGGACCGGCT | 180 |
|                           |                          | Tet2 <sup>GFP/GFP</sup>   | Seq_2 | 96                                                              | CAGCACATGGACAGCGGAGGAGGAGGCCGAGAACCCTGTACTTTTCAGGGAGGCGGACCGGCT | 155 |
|                           |                          | Expected                  | Seq_1 | 181                                                             | TGTCGACGACGGCGGTCTCAGTGGTGTACGGTACAAACCgaacaggacagaaccacccat    | 240 |
|                           |                          | Tet2 <sup>GFP/GFP</sup>   | Seq_2 | 156                                                             | TGTCGACGACGGCGGTCTCAGTGGTGTACGGTACAAACCgaacaggacagaaccacccat    | 215 |
| <i>attL</i> Sequence      |                          |                           |       |                                                                 |                                                                 |     |
| Expected                  |                          | Seq_1                     | 241   | gctgagggcaccagactgagtcattcctgatagcaccaccttctcccatcagccataca     | 300                                                             |     |
| Tet2 <sup>GFP/GFP</sup>   |                          | Seq_2                     | 216   | GCTGAGGGCACCAGACTGAGTCCATTCTGATAGCACCACCTTCTCCCATCAGCCATACA     | 275                                                             |     |
| TET2 coding sequence      |                          |                           |       |                                                                 |                                                                 |     |

# Supplementary Figure 5

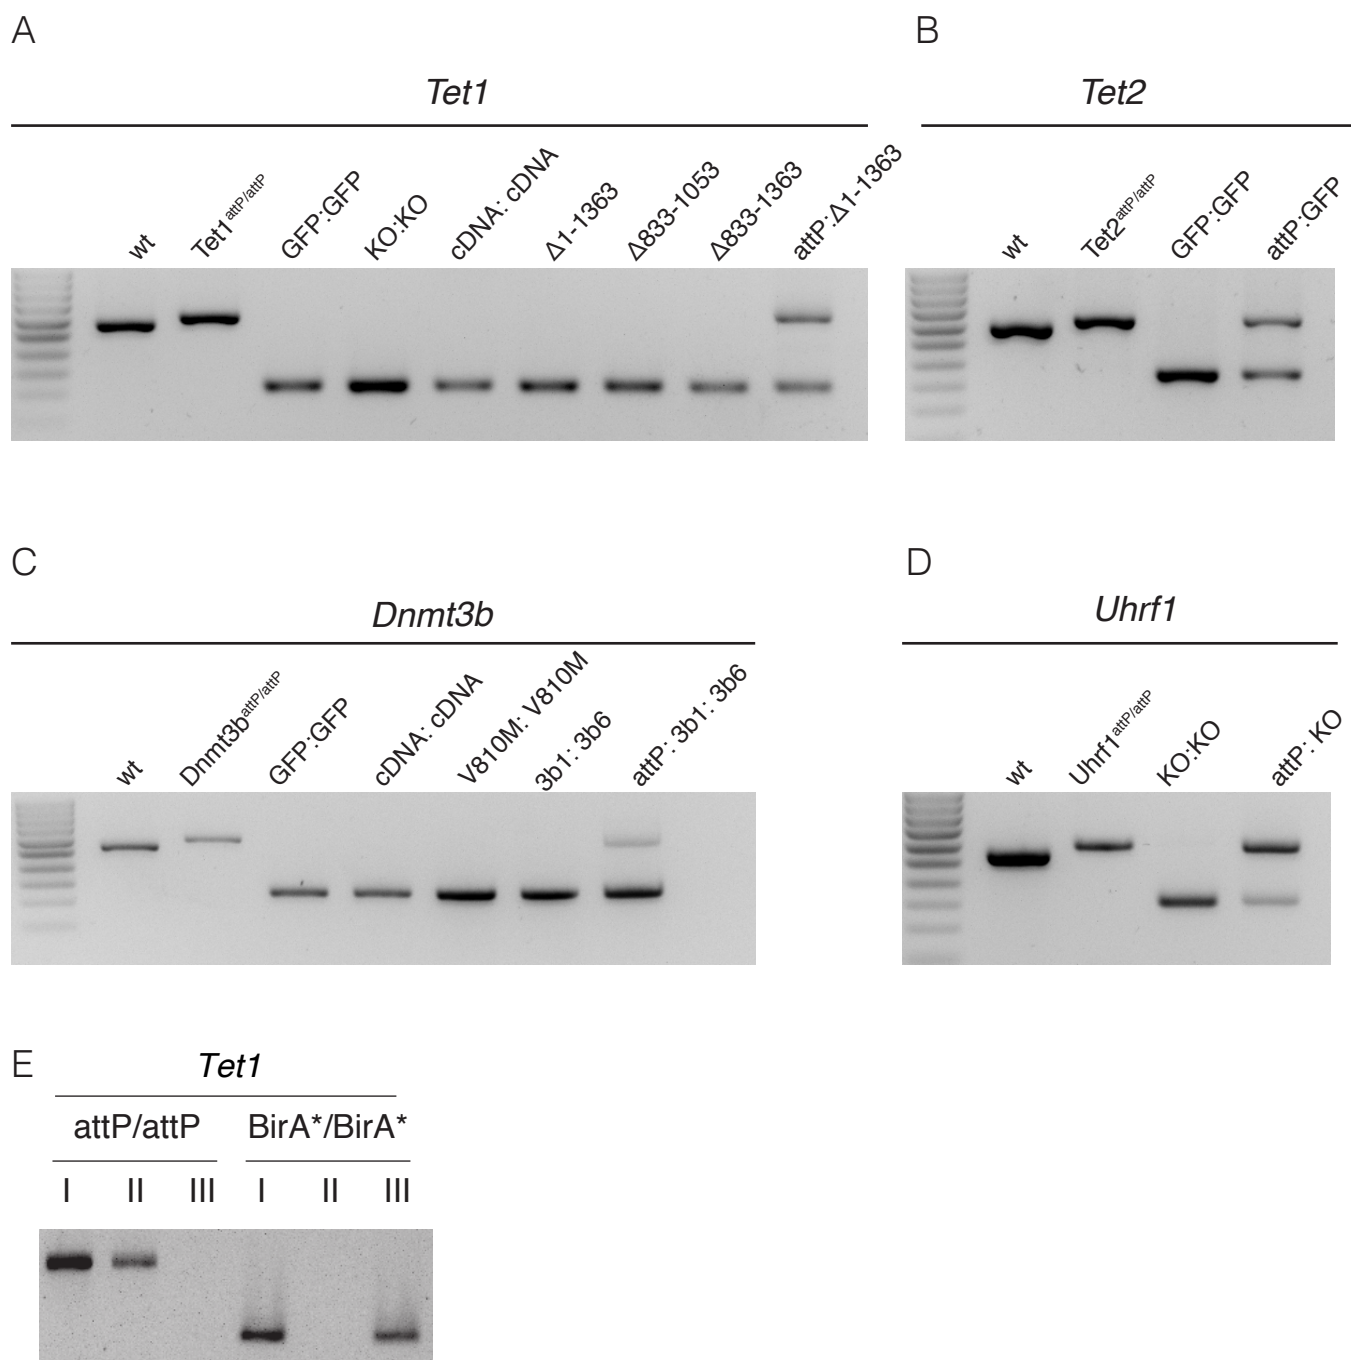

# Supplementary figure 6

A

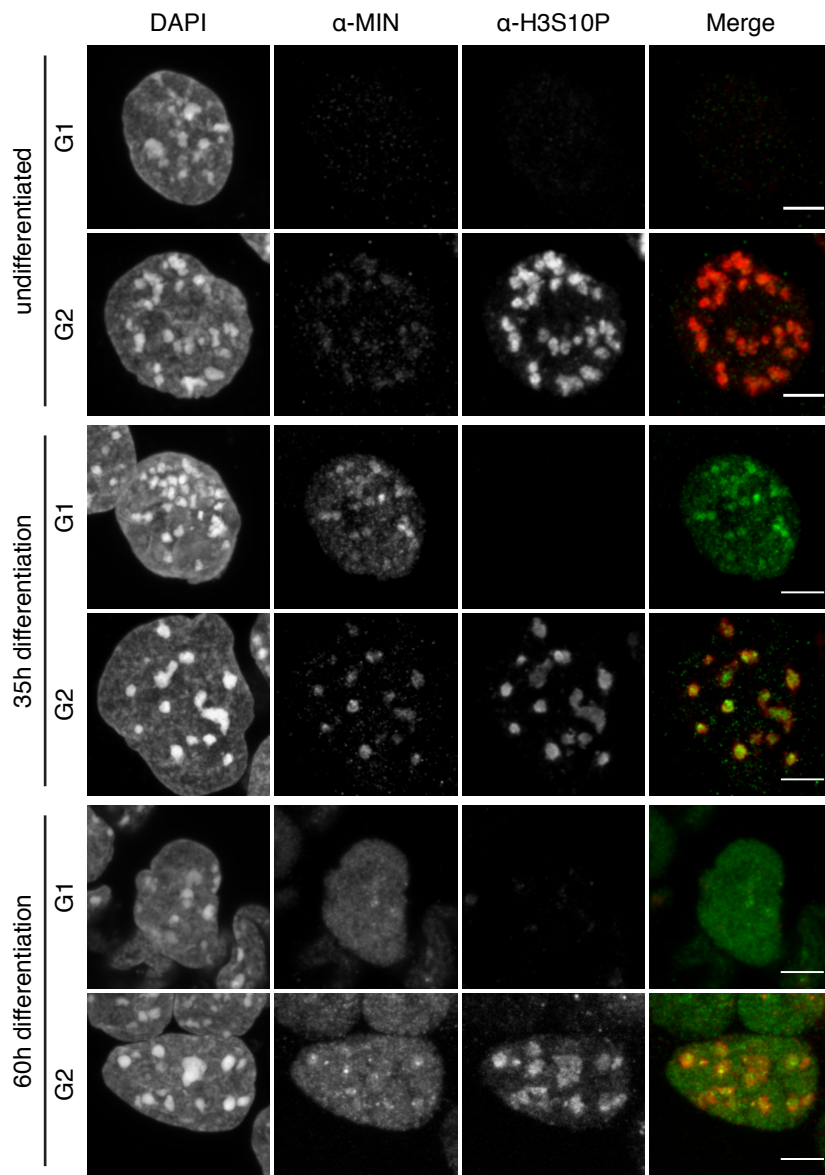

B

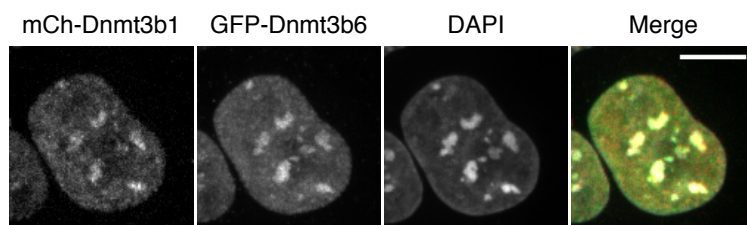

## Supplemental Figure and Video Legends

### Supplemental Figure S1. Characterization of MIN-tagged DNA methyltransferase cell lines.

**(A)** Western blot analysis of DNMT1 expression levels in the homozygous *Dnmt1*<sup>attP/attP</sup> and wild type J1 cells. Beta-actin is used as a loading control. **(B)** Immunofluorescence stainings of Dnmt1 in wt and *Dnmt1*<sup>attP/attP</sup> cells. Scale bar represent 5  $\mu$ m. **(C)** DNA methylation analysis of the major satellite repeats in *Dnmt1*<sup>attP/attP</sup> and wild type cells. **(D)** Example of the screening PCRs, with and without HincII treatment, of clones found to be heterozygous and homozygous for the MIN-tag at the *Dnmt1* locus. Monoallelic and biallelic insertions of the MIN-tag can be distinguished by complete and incomplete digests, respectively. **(E)** Western blot analysis of DNMT3A expression levels in a heterozygous (#2) and homozygous (#1, #3-4) *Dnmt3a*<sup>attP/attP</sup> cell lines compared to wild type cells. Beta-actin is used as a loading control. **(F)** DNA methylation analysis of major satellite repeats in *Dnmt3a*<sup>attP/attP</sup> compared to wt cells. **(G)** Immunofluorescence stainings of DNMT3A together with the replication marker EdU in wt cells and the the homozygous *Dnmt3a*<sup>attP/attP</sup> clone #1. Scale bar represents 10  $\mu$ m. **(H)** Immunofluorescence stainings of DNMT3B in *Dnmt3b*<sup>attP/attP</sup> and wt cells after 35 hours of EpiLC differentiation. Scale bar represents 5  $\mu$ m. Error bar represent standard deviation (n=2).

### Supplemental Figure S2. Characterization of MIN-tagged Tet1, Tet2 and Uhrf1 cell lines and C-terminal MIN-tag integration.

**(A-C)** Western blot analysis of TET1, TET2, and UHRF1 expression levels in the homozygous *Tet1*<sup>attP/attP</sup>, *Tet2*<sup>attP/attP</sup>, and N-terminal *Uhrf1*<sup>attP/attP</sup> cell lines, respectively, compared to the wt J1 control.  $\beta$ -Actin (ACTB) was used as loading control. **(D)** Immunofluorescence stainings of TET1 in wt and *Tet1*<sup>attP/attP</sup> cells. **(E)** Immunofluorescence stainings of 5-hydroxymethylcytosine (5-hmC) in wt and *Tet1*<sup>attP/attP</sup> cells. **(F)** Immunofluorescence stainings of TET2 in wt and *Tet2*<sup>attP/attP</sup> cells. **(G)**

Immunofluorescence stainings of UHRF1 in wt and *Uhrf1<sup>attP/attP</sup>* cells. DAPI is used for DNA counterstaining; scale bars represent 15  $\mu\text{m}$ . **(H)** Schematic overview of CRISPR/Cas-assisted C-terminal integration of the MIN-tag. MIN-tag donors contain the attP site (depicted in orange) flanked by sequences (200-300 for PCR fragments or 76 for ssDNA oligos) homologous to 5' and 3' of the target gene stop codon (depicted in red). Restriction enzyme sites available for restriction fragment analysis based screening are shown above the attP sequence.

### **Supplemental Figure S3. Evaluating functionality of Bxb1 mediated recombination in *Dnmt1<sup>attP/attP</sup>* cells.**

**(A)** Schematic outline of the multiplex PCR strategy to identify positive recombination events and their zygosity. **(B)** Immunofluorescence stainings of DNMT1 and GFP in wt cells and three *Dnmt1<sup>KO/KO</sup>* clones. Diffuse GFP indicates a successful integration of the KO cassette into the locus. **(C)** Western blot analysis of DNMT1 expression levels in three *Dnmt1<sup>KO/KO</sup>* clonal cell lines generated by Bxb1-mediated insertion of a knock-out cassette, compared to wt and *Dnmt1<sup>attP/attP</sup>* cells. **(D)** Western blot analysis of DNMT1 and GFP expression in *Dnmt1<sup>attP/attP</sup>* cells and two homozygous GFP-knock in cell lines (*Dnmt1<sup>GFP/GFP</sup>* #1-2) generated by Bxb1 mediated insertion. **(E-F)** Live cell imaging of *Dnmt1<sup>GFP/GFP</sup>* and *Dnmt1<sup>cDNA/cDNA</sup>* cells transiently expressing RFP-labeled PCNA, a DNA replication marker, during cell-cycle progression. Scale bars represent 5  $\mu\text{m}$

### **Supplemental Figure S4. Alignments of the expected sequence flanking the attL site after recombination**

Alignments of the expected sequence flanking the attL site after recombination of the attB-GFP KI at the *Dnmt1*, *Dnmt3b*, *Tet1*, and *Tet2* locus (A-D) with the sequencing results from the *Dnmt1<sup>GFP/GFP</sup>*, *Dnmt3b<sup>GFP/GFP</sup>*, *Tet1<sup>GFP/GFP</sup>*, and *Tet2<sup>GFP/GFP</sup>* cell lines.

### **Supplemental Figure S5. Demonstration of Bxb1 mediated recombination in multiple MIN-tagged genes.**

**(A-D)** Gel electrophoresis of the multiplex PCR (using the attL primer and locus specific



external primers, see also Table S1) performed on cell lines generated by Bxb1-mediated integration of various MIN-tag toolbox components (Table S5) into the loci of: (A) Tet1, (B) Tet2, (C) Dnmt3b, and (D) Uhrf1. Equal mixtures of genomic DNA from non-recombined cell lines and recombined cell lines are used to control for possible amplification biases arising from the use of different locus specific external primers. (E) PCR to confirm insertion of the BirA\* cassette into the Tet1 genomic locus. I: multiplex PCR, II: wt specific PCR, III: attL (recombination) specific PCR

**Supplemental Figure S6. Cell cycle analysis of DNMT3b localization during differentiation.**

(A) Immunofluorescence stainings of MIN-tagged DNMT3B and Histone 3 Serine 10 phosphorylation (H3S10P), a marker of G2/M phase (Ref Hendzel:1997wo) during differentiation of naive pluripotent *Dnmt3b<sup>attP/attP</sup>* stem cells into epiblast-like cells. Cells were fixed directly after (0 h)35 h, or 60 h after induction of differentiation. The H3S10P mark was used to determine if cells were in G2 or G1 phase in order to assess whether changes in DNMT3B localization during differentiation are cell-cycle dependent. Scale bar represents 5  $\mu\text{m}$ . (B) Fluorescence microscopy images of *Dnmt3b<sup>mCh-3b1/GFP-3b6</sup>* cells fixed after 35 h of differentiation. Both DNMT3B isoforms (GFP-DNMT3B1 in green and mCh-DNMT3B6 in red) localize at chromocenters (visible as bright DAPI spots). Scale bar represents 5  $\mu\text{m}$

**Supplemental Video 1. Live cell imaging of *Dnmt3b<sup>GFP/GFP</sup>* cells during differentiation.**

Long-term (60 h), live cell imaging tracking the transition of *Dnmt3b<sup>GFP/GFP</sup>* cells from the naive pluripotency ground state into the primed, epiblast-like state. Images were acquired once per hour and entailing at least 10  $\mu\text{m}$  z-stacks. The left panel depicts the projection of GFP signal, while the right panel shows that projection superimposed onto the acquired brightfield images.

## Supplemental Tables (S1-S5)

**Table S1: CRISPR/Cas9-mediated MIN-tag insertion efficiencies**

| Gene          | Position   | MIN-tag Donor | Heterozygotes | Homozygotes  | TOTAL           |
|---------------|------------|---------------|---------------|--------------|-----------------|
| <b>Dnmt1</b>  | N-terminal | PCR Product   | 1/67 (1.5%)   | 1/67 (1.5%)  | 2/67<br>(2.9%)  |
| <b>Dnmt3a</b> | N-terminal | PCR Product   | 0/86 (0%)     | 3/86 (3.5%)  | 3/86<br>(3.5%)  |
| <b>Dnmt3b</b> | N-terminal | ssDNA oligo   | 0/65(0%)      | 1/65(1.5%)   | 1/65<br>(1.5%)  |
| <b>Uhrf1</b>  | N-terminal | PCR Product   | 0/6 (0%)      | 1/6(16.7%)   | 1/6<br>(16.7%)  |
| <b>Uhrf1</b>  | C-terminal | ssDNA oligo   | 2/36 (5.5%)   | 2/36 (5.6 %) | 4/36<br>(11.1%) |
| <b>Tet1</b>   | N-terminal | PCR Product   | 0/70(0%)      | 1/70 (1.4%)  | 1/70<br>(1.4%)  |
| <b>Tet2</b>   | N-terminal | PCR Product   | 1/24 (4.2%)   | 2/24 (8.3%)  | 3/24<br>(12.5%) |
| <b>Tet3</b>   | N-terminal | PCR Product   | 0/38 (0%)     | 2/38 (5.3%)  | 2/38<br>(5.3%)  |

**Table S2: Oligonucleotide sequences used for CRISPR/Cas assisted targeting and screening**

| Name        | Sequence                                                                                                                                                                                                           |
|-------------|--------------------------------------------------------------------------------------------------------------------------------------------------------------------------------------------------------------------|
| Dnmt1       |                                                                                                                                                                                                                    |
| gRNA_F      | TGTTTCGCGCTGGCATCTTGCCTTTTAGAGCTAGAAATAGCAAG                                                                                                                                                                       |
| gRNA_R      | GCAAGATGCCAGCGCGAACACGGTGTTCGTCCCTTCCAC                                                                                                                                                                            |
| surrogate_F | CTAGCTGTTTCGCGCTGGCATCTTGCAGGGGATTCC                                                                                                                                                                               |
| surrogate_R | CCGGAGGAATCCCCTGCAAGATGCCAGCGCGAACAG                                                                                                                                                                               |
| internal_R  | CACTATAGCCAGGAGGTGTGGG                                                                                                                                                                                             |
| internal_F  | TGTACCGTACACCACTGAGACCGGGTGGTTGACCAGACAAACCCATCTTGCAGGTTGCA<br>GACGACAG                                                                                                                                            |
| external_R  | GTCTGGTCAACCACCGGGTCTCAGTGGTGTACGGTACAAACCCAGCGCGAACAGCTCC<br>AGC                                                                                                                                                  |
| external_F  | GCGCGACAGGAAGCACAGCC                                                                                                                                                                                               |
| screening_F | GTCGCAGCACGGACGAG                                                                                                                                                                                                  |
| Uhrf1 (N)   |                                                                                                                                                                                                                    |
| gRNA_F      | CATCGGCATCATGTGGATCCGTTTTAGAGCTAGAAATAGCAAG                                                                                                                                                                        |
| gRNA_R      | GGATCCACATGATGCCGATGCGGTGTTCGTCCCTTCCAC                                                                                                                                                                            |
| surrogate_F | CTAGCCATCGGCATCATGTGGATCCAGGGGATTCCCT                                                                                                                                                                              |
| surrogate_R | GGCCAGGAATCCCCTGGATCCACATGATGCCGATGG                                                                                                                                                                               |
| internal_R  | CATCGGCATCATGTGGATCCGTTTTAGAGCTAGAAATAGCAAG                                                                                                                                                                        |
| internal_F  | GGATCCACATGATGCCGATGCGGTGTTCGTCCCTTCCAC                                                                                                                                                                            |
| external_R  | ACCACCGGGTCTCAGTGGTGTACGGTACAAACCTGGATCCAGGTTCGAACTATG                                                                                                                                                             |
| external_F  | CTATTGCTTGGTGGCTTTGAG                                                                                                                                                                                              |
| screening_F | GGCAATTCACATTC AAGTGTCCC                                                                                                                                                                                           |
| Uhrf1 (C)   |                                                                                                                                                                                                                    |
| gRNA_F      | TGCCTGGGTCTCAGCATCACGTTTTAGAGCTAGAAATAGCAAG                                                                                                                                                                        |
| gRNA_R      | GTGATGCTGAGACCCAGGCACGGTGTTCGTCCCTTCCAC                                                                                                                                                                            |
| surrogate_F | CTAGCTGCCTGGGTCTCAGCATCACCGGGGATTCCCT                                                                                                                                                                              |
| surrogate_R | CCGGAGGAATCCCCGGTGATGCTGAGACCCAGGCAG                                                                                                                                                                               |
| ssDNA oligo | CAGCTCCCCAACCCGGGTGAACCAGCCCTTGACAGACCATTCTCAACCAGCTCTTCCCTGG<br>CTATGGCAGCGCCGGGTTTGTCTGGTCAACCACCGGGTCTCAGTGGTGTACGGTACA<br>AACCTGATGCTGAGACCCAGGCAGAGGGCTCATGGTTCCAACCTCATAGTGTGTTAGCT<br>TGAAGGTGTTGTCCCTTCACG |
| external_R  | TTTCTAGGCAGCTGGTGTGG                                                                                                                                                                                               |
| external_F  | TGTACGTGAGAGGACGGAGT                                                                                                                                                                                               |
| screening_F | TGTTGCCAGGAGCTACCAAG                                                                                                                                                                                               |
| Dnmt3a      |                                                                                                                                                                                                                    |
| gRNA_F      | GGGCCGCTGGAGGGCATTGCGTTTTAGAGCTAGAAATAGCAAG                                                                                                                                                                        |
| gRNA_R      | GCAATGCCCTCCAGCGGCCCGGTGTTCGTCCCTTCCAC                                                                                                                                                                             |
| surrogate_F | CTAGCGGGCCGCTGGAGGGCATTGCTGGGGATTCCCT                                                                                                                                                                              |
| surrogate_R | CCGGAGGAATCCCCAGCAATGCCCTCCAGCGGCCCG                                                                                                                                                                               |
| internal_R  | CTTCTCTTCCCCACAGGCAG                                                                                                                                                                                               |
| internal_F  | ACCACTGAGACCGGGTGGTTGACCAGACAAACCCATTGCTGGGCAGTAGGCG                                                                                                                                                               |
| external_R  | ACCACCGGGTCTCAGTGGTGTACGGTACAAACCCCTCCAGCGGCCCG                                                                                                                                                                    |
| external_F  | GTTCCCAGCCAAGCACCTAT                                                                                                                                                                                               |
| screening_F | ATGGTCTTGCAACCAGAGTG                                                                                                                                                                                               |
| Dnmt3b      |                                                                                                                                                                                                                    |
| gRNA_F      | TTCCCCACAGGAAACAATGAGTTTTAGAGCTAGAAATAGCAAG                                                                                                                                                                        |
| gRNA_R      | TCATTGTTTCTGTGGGGAACGGTGTTCGTCCCTTCCAC                                                                                                                                                                             |

|             |                                                                                                                                                                                                                      |
|-------------|----------------------------------------------------------------------------------------------------------------------------------------------------------------------------------------------------------------------|
| surrogate_F | CTAGCTTCCCCACAGGAAACAATGAAGGGGATTCCCT                                                                                                                                                                                |
| surrogate_R | CCGGAGGAATCCCCTTCATTGTTTCTGTGGGGAAG                                                                                                                                                                                  |
| ssDNA oligo | GAACTGGTGGTGTAAACCTTGCACTGTGCCCTGTCTGCCTCTTACATATCCTGATCTTTC<br>CCCACAGGAAACAATGGGTTTGTCTGGTCAACCACCGCGGTCTCAGTGGTGTACGGTACA<br>AACCAAGGGAGACAGCAGACATCTGAATGAAGAAGAGGGTGCCAGCGGGTATGAGGAGTG<br>CATTATCGTTAATGGGAACT |
| external_R  | ACCACCGCGGTCTCAGTGGTGTACGGTACAAACCGGAGACAGCAGACATCTGAATG                                                                                                                                                             |
| external_F  | ATCTGTTCATGGAACCTGCCG                                                                                                                                                                                                |
| screening_F | GAGCTGGCCAATTGCAGAAC                                                                                                                                                                                                 |
| Tet1        |                                                                                                                                                                                                                      |
| gRNA_F      | AGACATGGCTGCAGAGTAAGCGGTGTTTCGTCCCTTTCCAC                                                                                                                                                                            |
| gRNA_R      | CTTACTCTGCAGCCATGTCTAGCTTTCTTGTACAAAGTTGGCAT                                                                                                                                                                         |
| surrogate_F | CTAGCCTTACTCTGCAGCCATGTCTCGGGGATCCCCT                                                                                                                                                                                |
| surrogate_R | CCGGAGGGATCCCCGAGACATGGCTGCAGAGTAAGG                                                                                                                                                                                 |
| internal_R  | ACTCAGTCTCCCAAATGCTGG                                                                                                                                                                                                |
| internal_F  | ACCACTGAGACCGCGGTGGTTGACCAGACAAACCAGACATGGCTGCAGAGTAAGTAAAG                                                                                                                                                          |
| external_R  | ACCACCGCGGTCTCAGTGGTGTACGGTACAAACCGGTCCCCGCCCGCAAAG                                                                                                                                                                  |
| external_F  | TCGGGGTTTTGTCTTCCGTT                                                                                                                                                                                                 |
| screening_F | GGGCAATGTTGTGACTCATGC                                                                                                                                                                                                |
| Tet2        |                                                                                                                                                                                                                      |
| gRNA_F      | CGAAGCAAGCCTGATGGAACGTTTTAGAGCTAGAAATAGCAAG                                                                                                                                                                          |
| gRNA_R      | GTTCCATCAGGCTTGCTTCGCGGTGTTTCGTCCCTTTCCAC                                                                                                                                                                            |
| surrogate_F | CTAGCCGAAGCAAGCCTGATGGAACAGGGGATTCCCT                                                                                                                                                                                |
| surrogate_R | CCGGAGGAATCCCCTGTTCCATCAGGCTTGCTTCGG                                                                                                                                                                                 |
| internal_R  | ACCACTGAGACCGCGGTGGTTGACCAGACAAACCCATCAGGCTTGCTTCGGGG                                                                                                                                                                |
| internal_F  | ACCACCGCGGTCTCAGTGGTGTACGGTACAAACCGAACAGGACAGAACCACCCAT                                                                                                                                                              |
| external_R  | TGGTTCACTGACTGTGCGTT                                                                                                                                                                                                 |
| external_F  | CCAGGATCACACAGGAAGCA                                                                                                                                                                                                 |
| screening_F | GGATGGAGCCCAGAGAGAGA                                                                                                                                                                                                 |
| Tet3        |                                                                                                                                                                                                                      |
| gRNA_F      | GTTCCAGGTCAGATGGACTCGTTTTAGAGCTAGAAATAGCAAG                                                                                                                                                                          |
| gRNA_R      | GAGTCCATCTGACCTGGAACCGGTGTTTCGTCCCTTTCCAC                                                                                                                                                                            |
| surrogate_F | CTAGCGTTCCAGGTCAGATGGACTCAGGGGATTCCCT                                                                                                                                                                                |
| surrogate_R | CCGGAGGAATCCCCTGAGTCCATCTGACCTGGAACG                                                                                                                                                                                 |
| internal_R  | ACCACTGAGACCGCGGTGGTTGACCAGACAAACCCATCTGACCTGGAACAGGTC                                                                                                                                                               |
| internal_F  | ACCACCGCGGTCTCAGTGGTGTACGGTACAAACCGACTCAGGGCCAGTGTACC                                                                                                                                                                |
| external_R  | CAGTCGGGCTTCTGGTCTAC                                                                                                                                                                                                 |
| external_F  | GATCTGAGCTCTCACAGGGC                                                                                                                                                                                                 |
| screening_F | AGTAGACAGGGCCTTGGGAT                                                                                                                                                                                                 |
| attL_F      | CCGGCTTGTCGACGACG                                                                                                                                                                                                    |

**Table S3: Bxb1-mediated recombination efficiencies**

| Gene          | Integration Construct                        | Heterozygotes  | Homozygotes    | TOTAL          |
|---------------|----------------------------------------------|----------------|----------------|----------------|
| <b>Dnmt1</b>  | attB-GFP                                     | N/A            | 13/31 (41.9%)  | 13/31 (41.9%)  |
| <b>Dnmt3b</b> | attB-GFP                                     | 0/3 (0%)       | 1/3 (33.3%)    | 1/3 (33.3%)    |
| <b>Tet1</b>   | attB-GFP                                     | 14/45 (31.1%)  | 13/45 (28.9%)  | 27/45 (60%)    |
| <b>Tet2</b>   | attB-GFP                                     | 28/81 (34.6%)  | 15/81(18.5%)   | 43/81 (53%)    |
| <b>Dnmt1</b>  | attB-GFP-STOP-Poly(A)                        | 2/23 (8.7%)    | 13/23 (56.5%)  | 15/23 (65.2%)  |
| <b>Uhrf1</b>  | attB-GFP-STOP-Poly(A)                        | 5/32 (15.6%)   | 14/32 (43.8%)  | 19/32 (59.4%)  |
| <b>Dnmt1</b>  | attB-GFP-cDNA-STOP-Poly(A)                   | 1/15 (6.6%)    | 9/15 (60%)     | 10/15 (66.6%)  |
| <b>Dnmt3b</b> | attB-GFP-cDNA-STOP-Poly(A)                   | 28/84 (33.3%)  | 26/84 (31%)    | 54/84 (64.3%)  |
| <b>Tet1</b>   | attB-GFP-cDNA-STOP-Poly(A)                   | 12/58 (20.7%)  | 7/58 (12.1%)   | 19/58 (32.8%)  |
| <b>Dnmt3b</b> | attB-GFP/mCh-cDNA-STOP-Poly(A)<br>PuroR/neoR | 29/102 (28.4%) | 64/102 (62.7%) | 93/102 (91.2%) |

**Table S4: Evaluation of FRAP protein kinetics**

|                                                              | GFP-DNMT3B | mCh-DNMT3B1 | GFP-DNMT3B6 |
|--------------------------------------------------------------|------------|-------------|-------------|
| <b>Mobile fraction [A]</b>                                   | 87         | 81          | 100         |
| <b>Diffusion coef. [<math>\mu\text{m}^2/\text{s}</math>]</b> | 4.2E-03    | 1.2E-03     | 4.1E-02     |
| <b>Half-time recovery [s]</b>                                | 42.2       | 94.8        | 5.1         |

**Table S5: The MIN-tag toolbox**

| Name                                    | Fluorescent protein | Application          |
|-----------------------------------------|---------------------|----------------------|
| <b>Universal constructs</b>             |                     |                      |
| attB-GFP                                | GFP                 | GFP KI               |
| attB-mCh                                | mCherry             | mCherry KI           |
| attB-GFP-T2A-BirA*                      | GFP                 | Protein interaction  |
| attB-GFP-Poly(A)                        | GFP                 | KO                   |
| attB-mCh-Poly(A)                        | mCherry             | KO                   |
| attB-GFP-Poly(A)-NeoR                   | GFP                 | KO /w selection      |
| attB-GFP-Poly(A)-PuroR                  | GFP                 | KO /w selection      |
| attB-mCh-Poly(A)-NeoR                   | mCherry             | KO /w selection      |
| attB-mCh-Poly(A)-PuroR                  | mCherry             | KO /w selection      |
| <b>Gene specific cDNA KI constructs</b> |                     |                      |
| attB-GFP-Dnmt1-Poly(A)                  | GFP                 | cDNA KI              |
| attB-GFP-Dnmt3b1-Poly(A)                | GFP                 | cDNA KI              |
| attB-GFP-Dnmt3b6-Poly(A)                | GFP                 | cDNA KI              |
| attB_eGFP_Dnmt3b_C656A_Poly(A)          | GFP                 | cDNA KI              |
| attB_eGFP_Dnmt3b_D809G_Poly(A)          | GFP                 | cDNA KI              |
| attB_eGFP_Dnmt3b_dX_Poly(A)             | GFP                 | cDNA KI              |
| attB_eGFP_Dnmt3b_G655S_Poly(A)          | GFP                 | cDNA KI              |
| attB_eGFP_Dnmt3b_L656T_Poly(A)          | GFP                 | cDNA KI              |
| attB_eGFP_Dnmt3b_V718G_Poly(A)          | GFP                 | cDNA KI              |
| attB_eGFP_Dnmt3b_V810M_Poly(A)          | GFP                 | cDNA KI              |
| attB_eGFP_Dnmt3b6_Poly(A)               | GFP                 | cDNA KI              |
| attB_eGFP_Dnmt3b1_dPWWP_Poly(A)         | GFP                 | cDNA KI              |
| attB_eGFP_Dnmt3b1_dPHD_Poly(A)          | GFP                 | cDNA KI              |
| attB_mCh_Dnmt3b_C656A_Poly(A)           | mCherry             | cDNA KI              |
| attB_mCh_Dnmt3b_D809G_Poly(A)           | mCherry             | cDNA KI              |
| attB_mCh_Dnmt3b_dX_Poly(A)              | mCherry             | cDNA KI              |
| attB_mCh_Dnmt3b_G655S_Poly(A)           | mCherry             | cDNA KI              |
| attB_mCh_Dnmt3b_L656T_Poly(A)           | mCherry             | cDNA KI              |
| attB_mCh_Dnmt3b_V718G_Poly(A)           | mCherry             | cDNA KI              |
| attB_mCh_Dnmt3b_V810M_Poly(A)           | mCherry             | cDNA KI              |
| attB_mCh_Dnmt3b6_Poly(A)                | mCherry             | cDNA KI              |
| attB-GFP-Dnmt3b1-Poly(A) -NeoR          | GFP                 | cDNA KI /w selection |
| attB-GFP-Dnmt3b6-Poly(A) -NeoR          | GFP                 | cDNA KI /w selection |
| attB_eGFP_Dnmt3b_C656A_Poly(A)-NeoR     | GFP                 | cDNA KI /w selection |
| attB_eGFP_Dnmt3b_D809G_Poly(A)-NeoR     | GFP                 | cDNA KI /w selection |
| attB_eGFP_Dnmt3b_dX_Poly(A)-NeoR        | GFP                 | cDNA KI /w selection |
| attB_eGFP_Dnmt3b_G655S_Poly(A)-NeoR     | GFP                 | cDNA KI /w selection |
| attB_eGFP_Dnmt3b_L656T_Poly(A)-NeoR     | GFP                 | cDNA KI /w selection |
| attB_eGFP_Dnmt3b_V718G_Poly(A)-NeoR     | GFP                 | cDNA KI /w selection |

|                                     |         |                      |
|-------------------------------------|---------|----------------------|
| attB_eGFP_Dnmt3b_V810M_Poly(A)-NeoR | GFP     | cDNA KI /w selection |
| attB_eGFP_Dnmt3b6_Poly(A)-NeoR      | GFP     | cDNA KI /w selection |
| attB- mCh -Dnmt3b1-Poly(A) -NeoR    | mCherry | cDNA KI /w selection |
| attB- mCh -Dnmt3b6-Poly(A) -NeoR    | mCherry | cDNA KI /w selection |
| attB_mCh_Dnmt3b_C656A_Poly(A)-NeoR  | mCherry | cDNA KI /w selection |
| attB_mCh_Dnmt3b_D809G_Poly(A)-NeoR  | mCherry | cDNA KI /w selection |
| attB_mCh_Dnmt3b_dX_Poly(A)-NeoR     | mCherry | cDNA KI /w selection |
| attB_mCh_Dnmt3b_G655S_Poly(A)-NeoR  | mCherry | cDNA KI /w selection |
| attB_mCh_Dnmt3b_L656T_Poly(A)-NeoR  | mCherry | cDNA KI /w selection |
| attB_mCh_Dnmt3b_V718G_Poly(A)-NeoR  | mCherry | cDNA KI /w selection |
| attB_mCh_Dnmt3b_V810M_Poly(A)-NeoR  | mCherry | cDNA KI /w selection |
| attB_mCh_Dnmt3b6_Poly(A)-PuroR      | mCherry | cDNA KI /w selection |
| attB- mCh -Dnmt3b1-Poly(A)-PuroR    | mCherry | cDNA KI /w selection |
| attB- mCh -Dnmt3b6-Poly(A)-PuroR    | mCherry | cDNA KI /w selection |
| attB_mCh_Dnmt3b_C656A_Poly(A)-PuroR | mCherry | cDNA KI /w selection |
| attB_mCh_Dnmt3b_D809G_Poly(A)-PuroR | mCherry | cDNA KI /w selection |
| attB_mCh_Dnmt3b_dX_Poly(A)- PuroR   | mCherry | cDNA KI /w selection |
| attB_mCh_Dnmt3b_G655S_Poly(A)-PuroR | mCherry | cDNA KI /w selection |
| attB_mCh_Dnmt3b_L656T_Poly(A)-PuroR | mCherry | cDNA KI /w selection |
| attB_mCh_Dnmt3b_V718G_Poly(A)-PuroR | mCherry | cDNA KI /w selection |
| attB_mCh_Dnmt3b_V810M_Poly(A)-PuroR | mCherry | cDNA KI /w selection |
| attB_mCh_Dnmt3b6_Poly(A)-PuroR      | mCherry | cDNA KI /w selection |
| attB-GFP-Tet1-Poly(A)               | GFP     | cDNA KI              |
| attB-GFP-Tet1d1-389-Poly(A)         | GFP     | cDNA KI              |
| attB-GFP-Tet1d390-565-Poly(A)       | GFP     | cDNA KI              |
| attB-GFP-Tet1d566-833-Poly(A)       | GFP     | cDNA KI              |
| attB-GFP-Tet1d834-1053-Poly(A)      | GFP     | cDNA KI              |
| attB-GFP-Tet1d1054-1363-Poly(A)     | GFP     | cDNA KI              |
| attB-GFP-Tet1d1-833-Poly(A)         | GFP     | cDNA KI              |
| attB-GFP-Tet1d834-1363-Poly(A)      | GFP     | cDNA KI              |
| attB-GFP-Tet2-Poly(A)               | GFP     | cDNA KI              |
| attB-GFP-Tet2d1-225-Poly(A)         | GFP     | cDNA KI              |
| attB-GFP-Tet2d226-398-Poly(A)       | GFP     | cDNA KI              |
| attB-GFP-Tet2d399-650-Poly(A)       | GFP     | cDNA KI              |
| attB-GFP-Tet2d651-848-Poly(A)       | GFP     | cDNA KI              |
| attB-GFP-Tet2d849-1038-Poly(A)      | GFP     | cDNA KI              |
| attB-GFP-Tet2d1-650-Poly(A)         | GFP     | cDNA KI              |
| attB-GFP-Tet2d651-1038-Poly(A)      | GFP     | cDNA KI              |
| attB-GFP-Uhrf1-Poly(A)              | GFP     | cDNA KI              |
| attB-GFP-Uhrf1dSRA-Poly(A)          | GFP     | cDNA KI              |

# Supplemental Table Legends

## **Table S1: CRISPR/Cas9-mediated MIN-tag insertion efficiencies**

For MIN-tag Insertion, J1 mESCs transfected with the appropriate MIN-tag donor oligonucleotides or PCR products along with the Cas9, gRNA, and CRISPR surrogate reporter vector were single cell sorted after enriching for cells with CRISPR/Cas activity. The number of clones with either a monoallelic or biallelic insertion of the MIN-Tag is shown in relation to the number of clones screened.

## **Table S2: Oligonucleotide sequences used for CRISPR/Cas assisted targeting and screening**

DNA oligonucleotides used for the generation of target specific gRNA expression vectors, surrogate reporters, and homology donors for MIN-tag integration.

## **Table S3: Bxb1-mediated recombination efficiencies**

For Bxb1-mediated recombination, J1 mESCs transfected with NLS-Bxb1, the Bxb1 surrogate reporter, and the respective attB-site containing integration construct were single-cell sorted after enrichment for cells with Bxb1 activity. The number of clones with either a monoallelic or biallelic integration of the listed construct is shown in relation to the total number of clones screened.

## **Table S4: Evaluation of FRAP protein kinetics**

Evaluation of FRAP kinetics (w/o 5-azadC treatment) performed in Dnmt3bGFP/GFP and Dnmt3bmCh-3b1/GFP-3b6 cells

## **Table S5: The MIN-tag toolbox**

Vectors generated for Bxb1 mediated recombination into MIN-tagged cell lines. KO: knockout, KI: knockin
